# Supplementary material for: The effects of long-term daily folic acid and vitamin B12 supplementation on genome-wide DNA methylation in elderly subjects
Source: PubMed Central journal article supplement (PMC4644301; doi:10.1186/s13148-015-0154-5), 2015-11-14

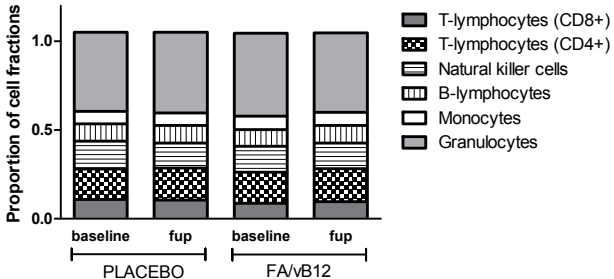

Supplement: 13148_2015_154_MOESM1_ESM.pdf [file 13148_2015_154_MOESM1_ESM.pdf]
