# Supplementary material for: The effects of long-term daily folic acid and vitamin B12 supplementation on genome-wide DNA methylation in elderly subjects
Source: PubMed Central journal article supplement (PMC4644301; doi:10.1186/s13148-015-0154-5), 2015-11-14
Supplement: 13148_2015_154_MOESM2_ESM.pdf [file 13148_2015_154_MOESM2_ESM.pdf]

**Supplementary Table S1: Top-100 positions that are differentially methylated after intervention with folic acid and vitamin B12.** Overview of the top-100 positions that are differentially methylated (Benjamini-Hochberg-adjusted p-value <0.05) after intervention with folic acid and vitamin B12 (FA/vB12). Changes for DNA methylation in the intervention group as well as the placebo group are presented as % beta-values and can range from 0-100%.

| Position   | P-value | adj.P.Val | chr | Gene(s)      | Methylation change for FA/vB12 (%) | Methylation change for placebo (%) |
|------------|---------|-----------|-----|--------------|------------------------------------|------------------------------------|
| cg27023953 | 1.5E-09 | 0.0004    | 22  | C22orf41     | 2.3                                | 0.7                                |
| cg11588710 | 1.6E-09 | 0.0004    | 3   | -            | 4.7                                | 2.4                                |
| cg22561380 | 3.4E-09 | 0.0004    | 8   | HOOK3        | 5.1                                | 3.0                                |
| cg02360155 | 3.6E-09 | 0.0004    | 4   | -            | 0.8                                | 0.4                                |
| cg26087862 | 6.2E-09 | 0.0005    | 1   | ENSA         | 2.3                                | 1.7                                |
| cg26561082 | 3.2E-08 | 0.0023    | 10  | DIP2C        | 4.3                                | 4.0                                |
| cg16308101 | 6.2E-08 | 0.0038    | 1   | SERBP1       | 2.4                                | 1.0                                |
| cg18944135 | 7.6E-08 | 0.0041    | 10  | -            | 1.4                                | 0.0                                |
| cg10664184 | 1.2E-07 | 0.0057    | 19  | DDA1         | 1.6                                | 0.6                                |
| cg01781745 | 1.5E-07 | 0.0067    | 9   | KLF9         | 1.1                                | -0.1                               |
| cg08494150 | 2.2E-07 | 0.0070    | 16  | HS3ST4       | 2.6                                | 2.0                                |
| cg04402803 | 2.2E-07 | 0.0070    | 12  | BLOC1S1      | 3.7                                | 1.3                                |
| cg21641186 | 2.2E-07 | 0.0070    | 3   | UROC1        | 1.9                                | 0.1                                |
| cg14749334 | 2.3E-07 | 0.0070    | 19  | RAB11B       | 2.1                                | 1.0                                |
| cg05055652 | 2.6E-07 | 0.0072    | 7   | ATP6V1F      | 2.7                                | 1.3                                |
| cg14458002 | 2.8E-07 | 0.0072    | 6   | RUNX2        | 2.2                                | 0.0                                |
| cg13089318 | 2.9E-07 | 0.0072    | 1   | -            | 2.8                                | 1.9                                |
| cg02070354 | 3.1E-07 | 0.0072    | 2   | RQCD1;USP37  | 1.2                                | 1.0                                |
| cg16429819 | 3.2E-07 | 0.0072    | 3   | GPX1         | 2.3                                | 0.9                                |
| cg05522145 | 3.9E-07 | 0.0084    | 7   | -            | 3.6                                | 1.5                                |
| cg16711165 | 4.1E-07 | 0.0084    | 11  | TIMM8B;SDHD  | 3.0                                | 2.4                                |
| cg17054900 | 5.0E-07 | 0.0098    | 3   | DHX36        | 6.0                                | 2.5                                |
| cg06880857 | 6.3E-07 | 0.0118    | 14  | DICER1       | 1.2                                | 0.1                                |
| cg00062070 | 7.0E-07 | 0.0125    | 15  | C15orf41     | 4.5                                | -0.6                               |
| cg12631604 | 7.3E-07 | 0.0125    | 21  | ATP50        | 2.1                                | 0.6                                |
| cg04138591 | 7.7E-07 | 0.0128    | 7   | -            | 2.5                                | 1.4                                |
| cg20488820 | 9.5E-07 | 0.0147    | 3   | -            | 1.1                                | -0.1                               |
| cg26088104 | 9.5E-07 | 0.0147    | 5   | C5orf34      | 1.7                                | 0.8                                |
| cg13022888 | 1.2E-06 | 0.0172    | 14  | SEL1L        | 2.9                                | 2.4                                |
| cg10714940 | 1.4E-06 | 0.0196    | 3   | GTF2E1;RABL3 | 2.5                                | 2.2                                |
| cg24406775 | 1.5E-06 | 0.0196    | 11  | SLC3A2       | 2.0                                | -0.2                               |
| cg17014947 | 1.5E-06 | 0.0196    | 15  | LOC723972    | 2.9                                | 1.9                                |
| cg04915044 | 1.6E-06 | 0.0196    | 2   | POLR1A       | 4.1                                | 2.5                                |
| cg01459962 | 1.6E-06 | 0.0196    | 16  | CCDC101      | 0.8                                | 0.3                                |
| cg03067660 | 1.6E-06 | 0.0196    | 6   | KLC4;MRPL2   | 1.3                                | 0.5                                |
| cg03414764 | 1.7E-06 | 0.0201    | 15  | KIAA1199     | 1.8                                | 0.8                                |
| cg00195828 | 1.8E-06 | 0.0206    | 8   | MFHAS1       | 3.2                                | 0.9                                |
| cg03986574 | 1.9E-06 | 0.0208    | 11  | SF1          | 1.3                                | 0.3                                |
| cg25627714 | 1.9E-06 | 0.0208    | 2   | NEURL3       | 1.7                                | 0.5                                |
| cg11755933 | 2.0E-06 | 0.0208    | 11  | PITPNM1      | 1.3                                | 0.5                                |
| cg12320164 | 2.0E-06 | 0.0208    | 17  | LOC645638    | -4.1                               | 0.4                                |
| cg26985354 | 2.1E-06 | 0.0208    | 19  | SFRS16       | 2.7                                | 1.4                                |
| cg24477193 | 2.1E-06 | 0.0208    | 1   | ALG14        | 1.6                                | 0.1                                |
| cg22963133 | 2.2E-06 | 0.0217    | 5   | ARL15        | 2.1                                | 1.1                                |
| cg19565299 | 2.3E-06 | 0.0222    | 2   | D2HGDH       | 0.6                                | 0.4                                |
| cg11754259 | 2.5E-06 | 0.0228    | 11  | ZBTB44       | 1.6                                | 0.1                                |
| cg20699097 | 2.5E-06 | 0.0228    | 11  | TIMM8B;SDHD  | 3.3                                | 1.7                                |
| cg02009091 | 2.5E-06 | 0.0228    | 19  | KLK13        | 1.7                                | -0.3                               |
| cg03133777 | 2.9E-06 | 0.0253    | 2   | BBS5         | 2.0                                | -0.1                               |
| cg13168924 | 3.0E-06 | 0.0253    | 19  | NDUFA7;RPS28 | 1.8                                | 1.5                                |
| cg09566392 | 3.0E-06 | 0.0253    | 2   | PQLC3        | 2.0                                | 0.7                                |
| cg06601475 | 3.2E-06 | 0.0257    | 13  | GPC5         | 1.2                                | -0.2                               |
| cg03651886 | 3.2E-06 | 0.0257    | 10  | -            | 1.5                                | 0.2                                |
| cg18487343 | 3.2E-06 | 0.0257    | 14  | -            | 4.9                                | 3.4                                |
| cg07240689 | 3.3E-06 | 0.0261    | 10  | PDCD11       | 3.7                                | 0.1                                |
| cg13962681 | 3.4E-06 | 0.0261    | 1   | RPS6KC1      | 1.2                                | 0.1                                |
| cg25420583 | 3.5E-06 | 0.0261    | 2   | WBP1         | 1.2                                | 0.8                                |
| cg21191822 | 3.5E-06 | 0.0261    | 6   | ZBTB9        | 1.7                                | 1.1                                |

|            |         |        |    |                 |     |      |
|------------|---------|--------|----|-----------------|-----|------|
| cg02674114 | 3.7E-06 | 0.0268 | 1  | ERI3            | 2.8 | 1.6  |
| cg10616672 | 3.8E-06 | 0.0270 | 12 | C12orf35        | 2.4 | 0.3  |
| cg07060117 | 3.9E-06 | 0.0273 | 16 | CFDP1           | 1.6 | 0.5  |
| cg03736944 | 4.3E-06 | 0.0298 | 16 | RAB40C          | 2.3 | 1.2  |
| cg25550279 | 4.4E-06 | 0.0300 | 7  | -               | 3.5 | 0.8  |
| cg17864619 | 4.5E-06 | 0.0300 | 19 | FOSB            | 1.0 | 0.5  |
| cg24612305 | 4.6E-06 | 0.0304 | 17 | TOM1L2;LRRC48   | 0.8 | 0.2  |
| cg13685680 | 4.8E-06 | 0.0312 | 12 | FBRSL1          | 1.7 | 0.4  |
| cg13529619 | 4.9E-06 | 0.0316 | 3  | RAD18           | 1.5 | 1.0  |
| cg23461432 | 5.1E-06 | 0.0316 | 11 | OR8U8           | 1.3 | -0.4 |
| cg18443378 | 5.1E-06 | 0.0316 | 4  | WDR17           | 2.4 | 0.0  |
| cg10746622 | 5.2E-06 | 0.0318 | 19 | PRSSL1          | 3.8 | -0.1 |
| cg17112695 | 5.2E-06 | 0.0318 | 12 | AGAP2           | 1.6 | 0.4  |
| cg19496566 | 5.3E-06 | 0.0319 | 19 | GLTSCR2         | 3.1 | 1.6  |
| cg16434365 | 5.5E-06 | 0.0320 | 16 | -               | 2.0 | -0.3 |
| cg07428804 | 5.5E-06 | 0.0320 | 11 | STX5            | 1.2 | 0.7  |
| cg06639079 | 5.7E-06 | 0.0327 | 19 | C19orf36;MOBK2A | 0.7 | 0.3  |
| cg17188367 | 5.9E-06 | 0.0329 | 6  | RNF5P1;AGPAT1   | 2.7 | 0.9  |
| cg04020138 | 5.9E-06 | 0.0329 | 3  | -               | 2.0 | 0.0  |
| cg16101101 | 6.4E-06 | 0.0348 | 1  | ILF2            | 2.7 | 2.5  |
| cg01188822 | 6.5E-06 | 0.0348 | 6  | YIPF3;POLR1C    | 1.2 | 0.9  |
| cg01276222 | 6.5E-06 | 0.0348 | 5  | CCNB1           | 3.1 | 1.1  |
| cg24927841 | 6.6E-06 | 0.0348 | 8  | -               | 4.5 | -1.8 |
| cg04166874 | 6.6E-06 | 0.0348 | 1  | ERI3            | 2.6 | 1.0  |
| cg08365438 | 7.0E-06 | 0.0352 | 10 | -               | 2.2 | 0.9  |
| cg14407075 | 7.0E-06 | 0.0352 | 12 | LARP4           | 2.6 | 1.6  |
| cg04214573 | 7.0E-06 | 0.0352 | 10 | ACSL5           | 2.1 | 0.8  |
| cg16349277 | 7.0E-06 | 0.0352 | 4  | -               | 4.5 | 4.0  |
| cg20977411 | 7.3E-06 | 0.0360 | 1  | PMVK            | 1.4 | 0.9  |
| cg09791459 | 7.4E-06 | 0.0360 | 16 | GFOD2           | 2.3 | 1.6  |
| cg05871614 | 7.5E-06 | 0.0365 | 22 | NHP2L1          | 3.3 | 1.3  |
| cg21581312 | 7.7E-06 | 0.0368 | 15 | LOC723972       | 3.2 | 2.0  |
| cg00999186 | 8.1E-06 | 0.0384 | 3  | -               | 1.6 | -0.3 |
| cg22376739 | 8.3E-06 | 0.0391 | 17 | TOM1L2;LRRC48   | 1.1 | 0.2  |
| cg26953093 | 8.4E-06 | 0.0391 | 14 | SIVA1           | 1.4 | 0.8  |
| cg26496372 | 8.6E-06 | 0.0394 | 5  | WDR70           | 1.0 | 0.6  |
| cg26109981 | 8.9E-06 | 0.0404 | 5  | -               | 1.6 | -0.3 |
| cg17223624 | 9.2E-06 | 0.0411 | 19 | GPR108          | 1.6 | 1.7  |
| cg22105215 | 9.3E-06 | 0.0415 | 5  | DTWD2           | 2.5 | -0.1 |
| cg04407474 | 9.7E-06 | 0.0428 | 1  | ORC1L;PRPF38A   | 1.7 | 0.7  |
| cg14087061 | 1.0E-05 | 0.0441 | 9  | HAUS6           | 3.4 | 1.4  |
| cg05065583 | 1.0E-05 | 0.0443 | 2  | CLK1            | 1.1 | 0.3  |
