# Supplementary material for: The effects of long-term daily folic acid and vitamin B12 supplementation on genome-wide DNA methylation in elderly subjects
Source: PubMed Central journal article supplement (PMC4644301; doi:10.1186/s13148-015-0154-5), 2015-11-14
Supplement: 13148_2015_154_MOESM3_ESM.pdf [file 13148_2015_154_MOESM3_ESM.pdf]

**Supplementary Table S2: Differentially methylated positions and regions related to serum levels of folate, vitamin B12 or plasma homocysteine.** Overview of the top-10 of **A)** differentially methylated positions as well as **B)** regions related to serum levels of folate, vitamin B12 or plasma homocysteine.

| <b>A) Differentially methylated positions</b> |            |          |     |             |              |                 |
|-----------------------------------------------|------------|----------|-----|-------------|--------------|-----------------|
|                                               |            | P-value  | chr | CpG density | Gene(s)      | Gene feature    |
| <b>Serum folate</b>                           |            |          |     |             |              |                 |
| 1                                             | cg00063734 | 1.88E-06 | 15  | S_Shore     | -            | IGR             |
| 2                                             | cg17054900 | 3.49E-06 | 3   | S_Shore     | DHX36        | TSS1500         |
| 3                                             | cg04138591 | 4.35E-06 | 7   | Island      | -            | IGR             |
| 4                                             | cg18630811 | 7.05E-06 | 19  | OpenSea     | ILF3         | Body            |
| 5                                             | cg16489826 | 7.24E-06 | 6   | Island      | TCP1; MRPL18 | TSS1500;TSS200  |
| 6                                             | cg13089318 | 1.04E-05 | 1   | OpenSea     | -            | IGR             |
| 7                                             | cg16101101 | 1.11E-05 | 1   | Island      | ILF2         | TSS200          |
| 8                                             | cg20143955 | 1.23E-05 | 1   | OpenSea     | TARS2        | TSS200          |
| 9                                             | cg11588710 | 1.27E-05 | 3   | OpenSea     | -            | IGR             |
| 10                                            | cg06860864 | 1.42E-05 | 6   | S_Shore     | -            | IGR             |
| <b>Serum vitamin B12</b>                      |            |          |     |             |              |                 |
| 1                                             | cg05180471 | 2.34E-06 | 6   | Island      | BAT5         | TSS200          |
| 2                                             | cg01334229 | 3.90E-06 | 3   | OpenSea     | -            | IGR             |
| 3                                             | cg13801712 | 4.18E-06 | 1   | Island      | RRAGC        | TSS1500         |
| 4                                             | cg03120115 | 8.67E-06 | 19  | N_Shelf     | ZNF347       | 5'UTR           |
| 5                                             | cg24792272 | 8.93E-06 | 8   | Island      | MCM4; PRKDC  | TSS1500;TSS1500 |
| 6                                             | cg06073402 | 1.02E-05 | 17  | Island      | DBF4B        | 5'UTR;1stExon   |
| 7                                             | cg19869971 | 1.40E-05 | 1   | OpenSea     | -            | IGR             |
| 8                                             | cg05805987 | 1.47E-05 | 8   | Island      | EIF3E        | TSS200          |
| 9                                             | cg01459962 | 1.55E-05 | 6   | Island      | CCDC101      | TSS200          |
| 10                                            | cg11079354 | 1.64E-05 | 6   | OpenSea     | BAT5         | TSS200          |
| <b>Plasma homocysteine</b>                    |            |          |     |             |              |                 |
| 1                                             | cg16002929 | 6.61E-07 | 5   | OpenSea     | SEMA5A       | Body            |
| 2                                             | cg11692577 | 1.32E-06 | 11  | OpenSea     | -            | IGR             |
| 3                                             | cg23366972 | 1.56E-06 | 21  | S_Shore     | C21orf2      | TSS1500         |
| 4                                             | cg00601648 | 1.54E-05 | 8   | OpenSea     | ADCY8        | Body            |
| 5                                             | cg04247967 | 1.97E-05 | 12  | N_Shelf     | -            | IGR             |
| 6                                             | cg04905210 | 2.21E-05 | 8   | N_Shore     | POLR3D       | TSS1500         |
| 7                                             | cg21456083 | 2.23E-05 | 19  | S_Shore     | -            | IGR             |
| 8                                             | cg04964676 | 2.78E-05 | 6   | OpenSea     | -            | IGR             |
| 9                                             | cg18485955 | 3.42E-05 | 16  | OpenSea     | TNFRSF17     | TSS1500         |
| 10                                            | cg21876145 | 3.55E-05 | 2   | OpenSea     | LAPTM4A      | Body            |

| <b>B) Differentially methylated regions (DMRs)</b> |                         |     |                                         |        |                     |          |         |         |
|----------------------------------------------------|-------------------------|-----|-----------------------------------------|--------|---------------------|----------|---------|---------|
|                                                    | Gene feature(s)         | Chr | hg19 coordinates                        | probes | minpval             | meanpval |         |         |
| <b>Serum folate (10/173 DMRs)</b>                  |                         |     |                                         |        |                     |          |         |         |
| 1                                                  | PDPK1,LOC652276         |     | 3'UTR,TSS1500,TSS200,Body               | 16     | 2652696-2653987     | 12       | 8.1E-07 | 1.2E-05 |
| 2                                                  | HOXA4                   |     | 1stExon,5'UTR,TSS200,TSS1500            | 7      | 27169957-27171401   | 22       | 5.9E-06 | 1.5E-03 |
| 3                                                  | VWA5B2,MIR1224          |     | Body,TSS200,3'UTR                       | 3      | 183959000-183959853 | 11       | 1.1E-05 | 1.3E-04 |
| 4                                                  | TMEM194A                |     | Body,1stExon,5'UTR,TSS200,TSS1500       | 12     | 57472074-57472858   | 13       | 3.6E-05 | 3.4E-04 |
| 5                                                  | -                       |     | -                                       | 5      | 8457548-8458392     | 7        | 4.7E-05 | 1.2E-04 |
| 6                                                  | ALKBH6,CLIP3            |     | Body,5'UTR,1stExon,TSS200,3'UTR,TSS1500 | 19     | 36504494-36505654   | 9        | 8.7E-05 | 1.4E-03 |
| 7                                                  | TOP2A                   |     | Body,5'UTR,1stExon,TSS200,TSS1500       | 17     | 38573776-38574599   | 16       | 9.5E-05 | 5.4E-03 |
| 8                                                  | GNB2L1,SNORD96A,SNORD95 |     | Body,TSS1500,TSS200,1stExon,5'UTR       | 5      | 180670058-180671419 | 23       | 9.8E-05 | 1.2E-03 |
| 9                                                  | BRCA1,NBR2              |     | 5'UTR,Body,TSS1500,1stExon,TSS200       | 17     | 41276606-41277847   | 22       | 1.0E-04 | 2.3E-03 |
| 10                                                 | C2orf63,RPS27A          |     | 5'UTR,TSS1500,TSS200,1stExon,Body       | 2      | 55458694-55460405   | 21       | 1.2E-04 | 7.0E-03 |
| <b>Serum vitamin B12 (10/425 DMRs)</b>             |                         |     |                                         |        |                     |          |         |         |
| 1                                                  | RNF5,AGPAT1,RNF5P1      |     | TSS1500,5'UTR,1stExon,TSS200,Body       | 6      | 32144667-32146779   | 37       | 6.5E-06 | 2.9E-03 |
| 2                                                  | TAGLN                   |     | TSS1500,TSS200,5'UTR,1stExon            | 11     | 117069479-117070485 | 7        | 6.5E-06 | 2.2E-05 |
| 3                                                  | PLD6                    |     | Body,1stExon,5'UTR,TSS200,TSS1500       | 17     | 17108846-17110353   | 16       | 2.6E-05 | 9.6E-04 |
| 4                                                  | C1orf109,CDCA8          |     | 1stExon,5'UTR,TSS200,TSS1500            | 1      | 38156178-38157567   | 15       | 4.4E-05 | 1.0E-02 |
| 5                                                  | PPP4C                   |     | TSS1500,TSS200,5'UTR,1stExon,Body       | 16     | 30086175-30087955   | 12       | 4.5E-05 | 6.9E-03 |
| 6                                                  | RRAGC                   |     | 1stExon,TSS200,TSS1500                  | 1      | 39325107-39325951   | 11       | 4.6E-05 | 3.9E-03 |
| 7                                                  | LOC149837               |     | Body,TSS200,TSS1500                     | 20     | 5485144-5485873     | 9        | 7.4E-05 | 1.9E-04 |
| 8                                                  | TRIM4                   |     | Body,1stExon,5'UTR,TSS200,TSS1500       | 7      | 99516603-99517509   | 14       | 7.5E-05 | 2.1E-04 |
| 9                                                  | -                       |     | -                                       | 1      | 113286397-113287238 | 6        | 8.0E-05 | 8.7E-04 |
| 10                                                 | SNORD84,BAT1            |     | Body,5'UTR,TSS1500,1stExon,TSS200       | 6      | 31508916-31510491   | 34       | 8.2E-05 | 3.3E-03 |
| <b>Plasma homocysteine (10/11 DMRs)</b>            |                         |     |                                         |        |                     |          |         |         |
| 1                                                  | HM13,PSIMCT-1           |     | Body,TSS1500,TSS200                     | 20     | 30134188-30135362   | 11       | 6.3E-11 | 4.5E-07 |
| 2                                                  | HLA-DPB1                |     | Body                                    | 6      | 33047944-33049360   | 21       | 4.0E-10 | 1.5E-04 |
| 3                                                  | -                       |     | -                                       | 8      | 1708438-1708526     | 3        | 3.4E-04 | 3.9E-04 |
| 4                                                  | -                       |     | -                                       | 20     | 62570072-62570696   | 3        | 4.0E-04 | 6.1E-04 |
| 5                                                  | TRIM6-TRIM34,TRIM6      |     | TSS1500,TSS200,1stExon,5'UTR            | 11     | 5617273-5617926     | 7        | 9.3E-04 | 5.5E-03 |
| 6                                                  | -                       |     | -                                       | 6      | 29895016-29895260   | 9        | 1.6E-03 | 1.3E-02 |
| 7                                                  | LMF1                    |     | Body                                    | 16     | 979662-980146       | 5        | 9.7E-03 | 1.8E-02 |
| 8                                                  | IL17RE                  |     | 1stExon,5'UTR                           | 3      | 9944512-9944537     | 2        | 1.1E-02 | 1.2E-02 |
| 9                                                  | NOTCH4                  |     | Body                                    | 6      | 32191210-32191496   | 4        | 2.8E-02 | 3.0E-02 |
| 10                                                 | -                       |     | -                                       | 2      | 74347616-74347776   | 2        | 4.1E-02 | 4.2E-02 |

For these analyses all 174 samples (n=172 for homocysteine because of 2 missing values) samples were included (i.e. baseline and follow-up samples for all 87 participants). In case no gene(s) is presented the specific differentially methylated position or region referred to an intergenic region. DMRs in Table 2b were identified using the DMRcate package available through Bioconductor. DMRs were sorted and presented based on the minimal p-value for all of the probes within the specific DMR. Abbreviations: IGR: intergenic region, DMR: differentially methylated region, hg19: coordinates for the human genome based on the Genome Reference Consortium Human Build 37 (hg19/GRCh37), Chr: chromosome, TSS200: 200 base pairs around the transcription start site, TSS1500: 1500 base pairs around the transcription start site, 3'UTR: 3' untranslated region, 5'UTR: 5'untranslated region.
